# Supplementary material for: Construction of a novel electrochemical biosensor based on a mesoporous silica/oriented graphene oxide planar electrode for detecting hydrogen peroxide
Source: Royal Society of Chemistry journal article supplement (doi:10.1039/d0ay00430h), 2020-01-01
Supplement: d0ay00430h1.pdf [file d0ay00430h1.pdf]

Sporting information  
for

# Construction of a Novel Electrochemical Biosensor Based on Mesoporous Silica/Oriented Graphene Oxide Planar Electrode for Detecting Hydrogen Peroxide

Kun-Chao Lu<sup>a</sup>, Ji-Kui Wang<sup>a\*</sup>, Dong-Hai Lin<sup>b\*</sup>, Xue Chen<sup>a</sup>, Shi-Yu Yin<sup>a</sup>, Guo-Song Chen<sup>a</sup>

<sup>a</sup>. School of Chemistry and Molecular Engineering, Nanjing Tech University, Nanjing 210009, China <sup>b</sup>School of Environmental and Materials Engineering, College of Engineering, Shanghai Polytechnic University, Shanghai 201209, China.

Email address: wjk@njtech.edu.cn (K. Wang); dhlin@sspu.edu.cn (D. Lin)

## Section 1 numerical model:

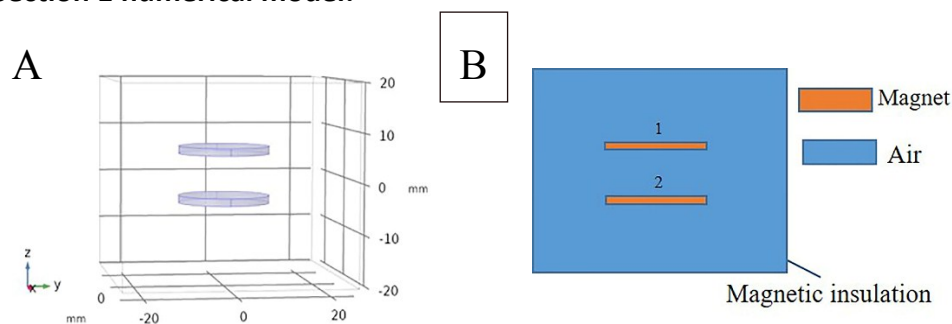

Figure S1 (A) Three-dimensional distribution map in the magnetic field model; (B) a schematic view of the section of the calculation domain (not to scale)

Figure S1A shows three-dimensional distribution map in the magnetic field model. Figure S1B indicates the y,z direction section at x coordinate 0 mm. Air zone width 50 mm, depth 50 mm, height 40 mm; magnet diameter 20 mm, high 1.5 mm. The magnet 1 center is located 5 mm, above the air domain center and the magnet 2 center is 5 mm below the air domain center. The model is AC/DC Module. The outer boundary of the air domain is magnetically insulated and the magnetic flux is conserved; the residual magnetic flux density of the magnet is 1.22 T.

## Section 2 Calculation of electrode activation area:

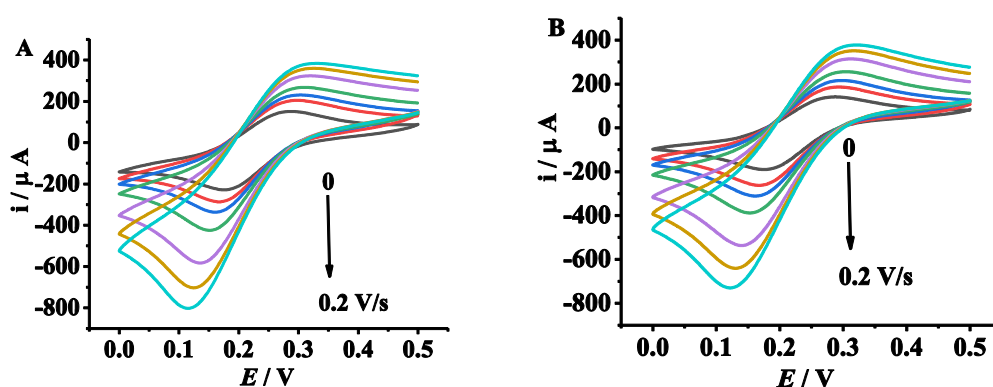

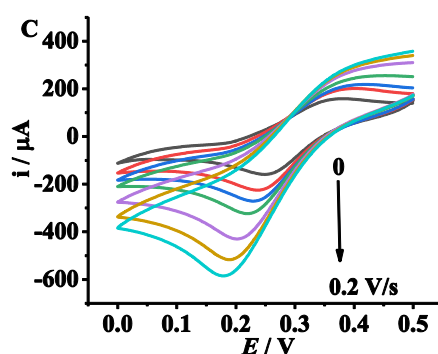

Figure S2 CV curves of (A)CMF/GO/HRP@MS electrode; (B)GO/HRP@MS electrode; and (C)HRP@MS electrode under potassium  $[\text{Fe}(\text{CN})_6]^{3-/4-}$  system with different scan rate(0.01, 0.02, 0.03, 0.05, 0.10, 0.15 and 0.20 V/s)

### Section 3 Electrode performance test:

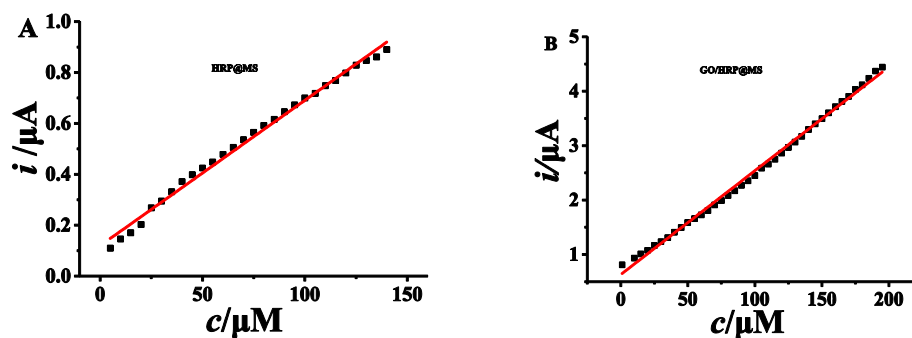

Figure S3 The reduction current curves of (A)HRP@MS electrode; (B) GO/HRP@MS electrode relative to  $\text{H}_2\text{O}_2$  concentration

### Section 4 Electrode detection repeatability and anti-interference ability:

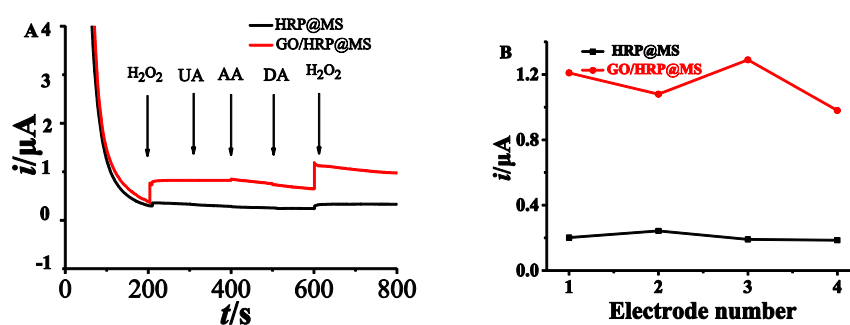

Figure S4 (A)The i-t curves of HRP@MS electrode (the black line) and GO/HRP@MS electrode (the red line) with continuous addition of 20  $\mu\text{M}$   $\text{H}_2\text{O}_2$ , UA, AA, DA; (B)the response of each electrode to the four in anaerobic PBS containing 20  $\mu\text{M}$   $\text{H}_2\text{O}_2$

### Section 5 Real sample detection:

Table S1. Determination of H<sub>2</sub>O<sub>2</sub> in real samples (HRP@MS)

| Sample  | Addition / $\mu\text{M}$ | Detection amount / $\mu\text{M}$ | RSD / % | Detection rate / % |
|---------|--------------------------|----------------------------------|---------|--------------------|
| Serum 1 | 5                        | 3.88                             | 8.55%   | 77.6%              |
| Serum 2 | 20                       | 16.34                            | 2.93%   | 81.7%              |
| Serum 3 | 100                      | 82.04                            | 6.30%   | 82.04%             |

Table S2. Determination of H<sub>2</sub>O<sub>2</sub> in real samples (GO/HRP@MS)

| Sample  | Addition / $\mu\text{M}$ | Detection amount / $\mu\text{M}$ | RSD / % | Detection rate / % |
|---------|--------------------------|----------------------------------|---------|--------------------|
| Serum 1 | 5                        | 4.17                             | 4.92%   | 80.03%             |
| Serum 2 | 20                       | 18.52                            | 5.27%   | 92.60%             |
| Serum 3 | 100                      | 86.88                            | 5.75%   | 86.88%             |
